# Supplementary material
Source: Springer Nature journal article supplement (https://www.springermedizin.de/resource/supplementary/13195_2012_131_MOESM4_ESM.pdf/9688268)

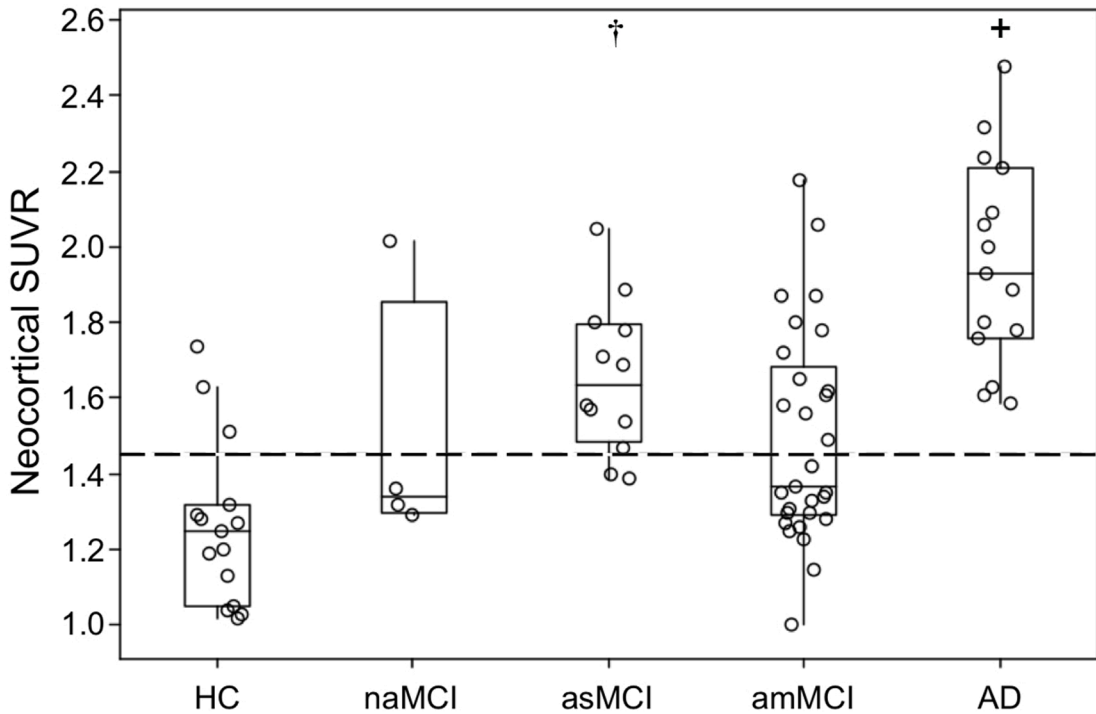

Supplement: MOESM4 [file 9688268]
